# Supplementary material for: CO 2 and summer insolation as drivers for the Mid-Pleistocene Transition
Source: Copernicus journal article supplement (doi:10.5194/cp-21-1061-2025), 2025-06-24
Supplement: Supplementary file 1 [file cp-21-1061-2025-supplement.pdf]

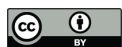

## *Supplement of*

# **CO<sub>2</sub> and summer insolation as drivers for the Mid-Pleistocene Transition**

**Meike D. W. Scherrenberg et al.**

*Correspondence to:* Meike D. W. Scherrenberg ([m.d.w.scherrenberg@uu.nl](mailto:m.d.w.scherrenberg@uu.nl))

The copyright of individual parts of the supplement might differ from the article licence.

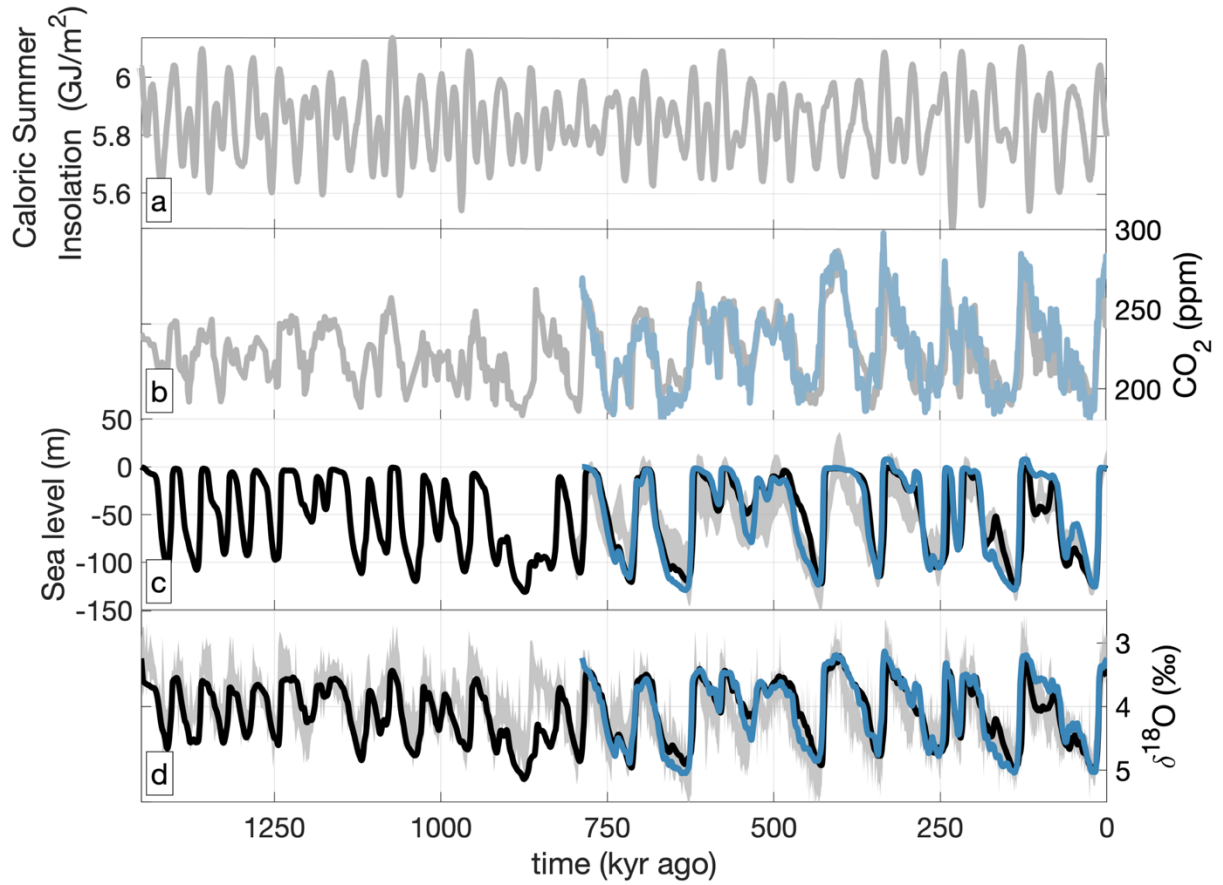

**Figure S1.** 1.5-million-year time-series of caloric summer half-year insolation (a), prescribed CO<sub>2</sub> forcing (b) from ice core (blue, Bereiter et al., 2015) and leaf-wax (gray, Yamamoto et al., 2022). Sea level (c) and benthic δ<sup>18</sup>O (d) of the baseline (black) and the simulation forced by ice-core CO<sub>2</sub> (blue). In grey, the reconstructions of caloric summer half-year insolation by Tzedakis et al., (2017; a), sea level by Spratt and Lisiecki, (2016; c) and δ<sup>18</sup>O by Ahn et al. (2017; d). Note that blue and black represent model output, while grey and light blue are reconstructions.

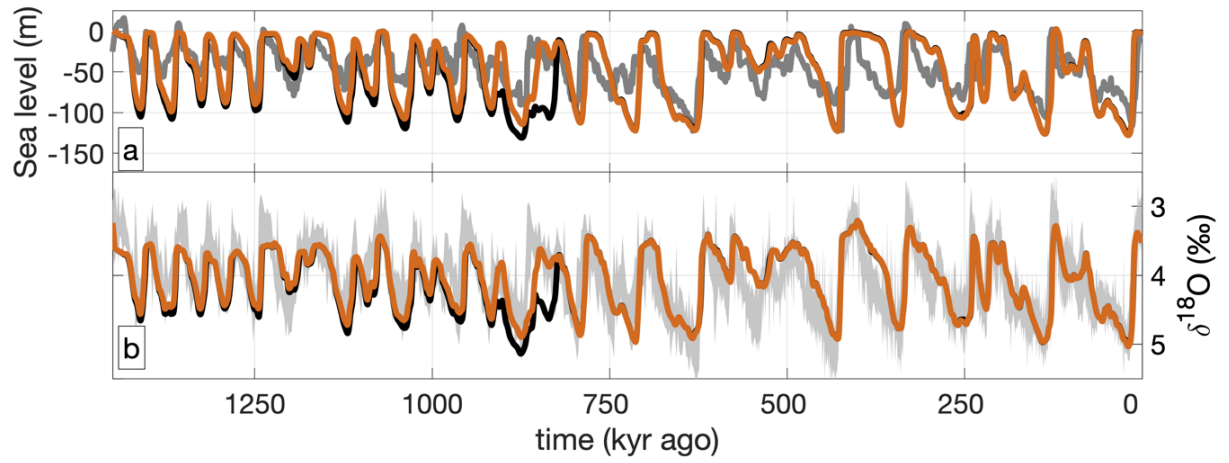

**Figure S2.** 1.5-million-year time-series of sea level (a) and  $\delta^{18}\text{O}$  (b). In black, the baseline simulation. Orange represents the sediment\_change, where we applied a homogenous sediment mask until 800 kyr ago, after which we apply the default (baseline) friction map. In grey, a sea level reconstruction from Rohling et al, (2021; a) and a  $\delta^{18}\text{O}$  record by Ahn et al. (2017; b).
